# Supplementary material
Source: HighWire-hosted journal article supplement (https://ard.bmj.com/content/79/5/612)
Supplement: inline-supplementary-material-1 [file inline-supplementary-material-1.pdf]

| <b>Supplementary Table 1. TRADITIONAL AND LUPUS-RELATED ATHEROSCLEROTIC RISK FACTORS AT BASELINE (EXCLUDING PATIENTS WITH ESRD)</b> |                                |                                      |                                    |          |
|-------------------------------------------------------------------------------------------------------------------------------------|--------------------------------|--------------------------------------|------------------------------------|----------|
| <b>Variable</b>                                                                                                                     | <b>≥140/90mmHg<br/>(n=145)</b> | <b>130-139/80-89mmHg<br/>(n=303)</b> | <b>&lt;130/80mmHg<br/>(n=1054)</b> | <b>p</b> |
| <b>Age (y)</b>                                                                                                                      | 47.3 ± 14.8                    | 39.9 ± 13.3                          | 33.4 ± 12.1                        | <0.001   |
| <b>Females (n, %)</b>                                                                                                               | 117 (80.7%)                    | 254 (83.8%)                          | 95 (90.1%)                         | <0.001   |
| <b>Caucasians (n, %)</b>                                                                                                            | 115 (79.3%)                    | 220 (72.6%)                          | 647 (61.4%)                        | <0.001   |
| <b>Blacks (n, %)</b>                                                                                                                | 20 (13.8%)                     | 37 (12.2%)                           | 150 (14.2%)                        |          |
| <b>Others (n, %)</b>                                                                                                                | 10 (6.9%)                      | 46 (15.2%)                           | 257 (24.4%)                        |          |
| <b>Adjusted mean BP (mmHg)</b>                                                                                                      | 149/90                         | 129/82                               | 112/71                             | <0.001   |
| <b>Diabetes (n, %)</b>                                                                                                              | 17 (11.7%)                     | 17 (5.6%)                            | 23 (2.2%)                          | <0.001   |
| <b>Dyslipidemia* (n, %)</b>                                                                                                         | 88 (60.7%)                     | 117 (38.6%)                          | 194 (18.4%)                        | <0.001   |
| <b>Total cholesterol (mmol/l)</b>                                                                                                   | 6.0 ± 1.8                      | 5.1 ± 1.3                            | 4.5 ± 1.1                          | <0.001   |
| <b>Smoking (current, n, %)</b>                                                                                                      | 34 (23.4%)                     | 56 (18.5%)                           | 159 (15.1%)                        | 0.003    |
| <b>Disease duration (y)</b>                                                                                                         | 5.4 ± 5.9                      | 6.6 ± 6.7                            | 6.0 ± 6.1                          | 0.125    |
| <b>SLEDAI-2K</b>                                                                                                                    | 5.2 ± 4.9                      | 5.2 ± 5.6                            | 4.2 ± 4.4                          | <0.001   |
| <b>SDI</b>                                                                                                                          | 0.8 ± 1.1                      | 0.6 ± 1.0                            | 0.5 ± 0.9                          | <0.001   |
| <b>eGFR (ml/min/1.73m<sup>2</sup>)</b>                                                                                              | 74.6 ± 27.2                    | 88.9 ± 29.7                          | 102.6 ± 28.5                       | <0.001   |
| <b>aPL** (n, %)</b>                                                                                                                 | 53 (36.6%)                     | 82 (27.1%)                           | 243 (23.1%)                        | 0.001    |
| <b>Antimalarials (n, %)</b>                                                                                                         | 47 (32.4%)                     | 170 (56.1%)                          | 717 (68.0%)                        | <0.001   |
| <b>Glucocorticosteroids (GCS) (n, %)</b>                                                                                            | 119 (82.1%)                    | 219 (72.3%)                          | 684 (64.9%)                        | <0.001   |
| <b>Cumulative GCS dose (g)***</b>                                                                                                   | 15.3 ± 18.6                    | 17.1 ± 19.1                          | 15.3 ± 18.6                        | 0.414    |
| <b>Antihypertensives (n, %)</b>                                                                                                     | 51 (35.2%)                     | 86 (28.4%)                           | 164 (15.6%)                        | <0.001   |
| <b>Antiplatelets/Anticoagulants (n, %)</b>                                                                                          | 7 (4.8%)                       | 18 (5.9%)                            | 91 (8.6%)                          | 0.117    |
| P values: trend from ANOVA for continuous variables, Chi-square test for categorical variables                                      |                                |                                      |                                    |          |
| *Abnormal total cholesterol or low-density lipoprotein for two consecutive visits                                                   |                                |                                      |                                    |          |
| ** Lupus anticoagulant and/or anticardiolipin antibodies (IgM, IgG)                                                                 |                                |                                      |                                    |          |
| ***From enrolment up to the baseline                                                                                                |                                |                                      |                                    |          |
| SLEDAI-2K: SLE Disease Activity Index 2000, SDI: Systemic Lupus International Collaborating Clinics Damage Index, eGFR:             |                                |                                      |                                    |          |

estimated glomerular filtration rate, aPL: antiphospholipid antibodies

| Supplementary Table 2. UNI- AND MULTIVARIABLE TIME DEPENDENT COX REGRESSION ANALYSIS FOR PREDICTORS OF AVEs (excluding patients with ESRD) |                      |            |          |                        |                  |                  |
|--------------------------------------------------------------------------------------------------------------------------------------------|----------------------|------------|----------|------------------------|------------------|------------------|
| Variable                                                                                                                                   | Univariable analysis |            |          | Multivariable analysis |                  |                  |
|                                                                                                                                            | HR                   | 95% CI     | <i>p</i> | HR                     | 95% CI           | <i>p</i>         |
| Stage 1 hypertension vs. normotensives                                                                                                     | 1.69                 | 1.11-2.57  | 0.015    | <b>1.64</b>            | <b>1.06-2.52</b> | <b>0.0246</b>    |
| Stage 2 hypertension vs. normotensives                                                                                                     | 1.99                 | 1.25-3.18  | 0.0038   | <b>1.66</b>            | <b>1.02-2.71</b> | <b>0.0417</b>    |
| Age                                                                                                                                        | 1.06                 | 0.94-1.20  | 0.3107   | 2.06                   | 0.95-4.46        | 0.0656           |
| Age-squared                                                                                                                                | 1.00                 | 1.00-1.00  | 0.4132   | 0.99                   | 0.99-1.00        | 0.0707           |
| Female                                                                                                                                     | 0.50                 | 0.31-0.81  | 0.005    | 0.70                   | 0.42-1.17        | 0.1700           |
| Caucasian                                                                                                                                  | 1.24                 | 0.78-1.95  | 0.3592   | 1.26                   | 0.78-2.04        | 0.3451           |
| Diabetes                                                                                                                                   | 1.64                 | 0.93-2.88  | 0.0862   | 1.32                   | 0.73-2.36        | 0.3576           |
| Dyslipidemia*                                                                                                                              | 2.55                 | 0.58-11.27 | 0.216    | 1.71                   | 0.33-8.89        | 0.5209           |
| Smoking                                                                                                                                    | 1.64                 | 1.05-2.56  | 0.0283   | <b>1.86</b>            | <b>1.17-2.96</b> | <b>0.0088</b>    |
| SLEDAI-2K                                                                                                                                  | 1.11                 | 1.07-1.15  | <.0001   | <b>1.10</b>            | <b>1.06-1.15</b> | <b>&lt;.0001</b> |
| eGFR                                                                                                                                       | 0.99                 | 0.99-1.00  | 0.0593   | 1.00                   | 0.99-1.00        | 0.4157           |
| Antiphospholipid antibodies**                                                                                                              | 1.74                 | 1.17-2.59  | 0.0061   | 1.41                   | 0.93-2.12        | 0.1036           |
| Glucocorticoids                                                                                                                            | 2.06                 | 1.42-2.99  | 0.0002   | <b>1.79</b>            | <b>1.21-2.65</b> | <b>0.0036</b>    |
| Anticoagulants/Antiplatelets                                                                                                               | 2.88                 | 1.96-4.23  | <.0001   | <b>3.14</b>            | <b>2.11-4.68</b> | <b>&lt;.0001</b> |

\*Abnormal total cholesterol or low-density lipoprotein for two consecutive visits  
 \*\* Lupus anticoagulant and/or anticardiolipin antibodies (IgM, IgG)  
 SLEDAI-2K: Systemic Lupus Erythematosus Disease Activity Index 2000, eGFR: estimated glomerular filtration rate
